# Supplementary material
Source: ML conference proceedings conference paper supplement (https://proceedings.mlr.press/v139/shi21d.html)
Supplement: Supplementary file 2 [file shi21d-supp.zip]

Archive with 184 entries (161 files):
- supp/
- supp/.DS_Store
- __MACOSX/
- __MACOSX/supp/
- __MACOSX/supp/._.DS_Store
- supp/suppD2OPE.pdf
- supp/D2OPE/
- supp/D2OPE/TOY/
- supp/D2OPE/TOY/_discrete.py
- __MACOSX/supp/D2OPE/
- __MACOSX/supp/D2OPE/TOY/
- __MACOSX/supp/D2OPE/TOY/.__discrete.py
- supp/D2OPE/TOY/TOY_TRIPLY.ipynb
- __MACOSX/supp/D2OPE/TOY/._TOY_TRIPLY.ipynb
- supp/D2OPE/TOY/_plot.py
- __MACOSX/supp/D2OPE/TOY/.__plot.py
- supp/D2OPE/TOY/TOY_coverage.ipynb
- __MACOSX/supp/D2OPE/TOY/._TOY_coverage.ipynb
- __MACOSX/supp/D2OPE/._TOY
- supp/D2OPE/ohio_n.png
- __MACOSX/supp/D2OPE/._ohio_n.png
- supp/D2OPE/ohio_tau.png
- __MACOSX/supp/D2OPE/._ohio_tau.png
- supp/D2OPE/_IS.py
- __MACOSX/supp/D2OPE/.__IS.py
- supp/D2OPE/.DS_Store
- __MACOSX/supp/D2OPE/._.DS_Store
- supp/D2OPE/_TRIPLE.py
- __MACOSX/supp/D2OPE/.__TRIPLE.py
- supp/D2OPE/LICENSE
- __MACOSX/supp/D2OPE/._LICENSE
- supp/D2OPE/_RL/
- supp/D2OPE/_RL/my_gym.py
- __MACOSX/supp/D2OPE/_RL/
- __MACOSX/supp/D2OPE/_RL/._my_gym.py
- supp/D2OPE/_RL/__init__.py
- __MACOSX/supp/D2OPE/_RL/.___init__.py
- supp/D2OPE/_RL/FQE.py
- __MACOSX/supp/D2OPE/_RL/._FQE.py
- supp/D2OPE/_RL/.ipynb_checkpoints/
- supp/D2OPE/_RL/.ipynb_checkpoints/my_gym-checkpoint.py
- __MACOSX/supp/D2OPE/_RL/.ipynb_checkpoints/
- __MACOSX/supp/D2OPE/_RL/.ipynb_checkpoints/._my_gym-checkpoint.py
- supp/D2OPE/_RL/.ipynb_checkpoints/FQI-checkpoint.py
- __MACOSX/supp/D2OPE/_RL/.ipynb_checkpoints/._FQI-checkpoint.py
- supp/D2OPE/_RL/.ipynb_checkpoints/sampler-checkpoint.py
- __MACOSX/supp/D2OPE/_RL/.ipynb_checkpoints/._sampler-checkpoint.py
- supp/D2OPE/_RL/.ipynb_checkpoints/DQN-checkpoint.py
- __MACOSX/supp/D2OPE/_RL/.ipynb_checkpoints/._DQN-checkpoint.py
- supp/D2OPE/_RL/.ipynb_checkpoints/FQE-checkpoint.py
- __MACOSX/supp/D2OPE/_RL/.ipynb_checkpoints/._FQE-checkpoint.py
- __MACOSX/supp/D2OPE/_RL/._.ipynb_checkpoints
- supp/D2OPE/_RL/DQN.py
- __MACOSX/supp/D2OPE/_RL/._DQN.py
- supp/D2OPE/_RL/sampler.py
- __MACOSX/supp/D2OPE/_RL/._sampler.py
- supp/D2OPE/_RL/FQI.py
- __MACOSX/supp/D2OPE/_RL/._FQI.py
- __MACOSX/supp/D2OPE/.__RL
- supp/D2OPE/__init__.py
- __MACOSX/supp/D2OPE/.___init__.py
- supp/D2OPE/script/
- supp/D2OPE/script/IS-Cart.ipynb
- __MACOSX/supp/D2OPE/script/
- __MACOSX/supp/D2OPE/script/._IS-Cart.ipynb
- supp/D2OPE/script/coindice-ohio.ipynb
- __MACOSX/supp/D2OPE/script/._coindice-ohio.ipynb
- supp/D2OPE/script/coindice-cart.ipynb
- __MACOSX/supp/D2OPE/script/._coindice-cart.ipynb
- supp/D2OPE/script/cartpole.ipynb
- __MACOSX/supp/D2OPE/script/._cartpole.ipynb
- supp/D2OPE/script/IS-Ohio.ipynb
- __MACOSX/supp/D2OPE/script/._IS-Ohio.ipynb
- supp/D2OPE/script/Ohio.ipynb
- __MACOSX/supp/D2OPE/script/._Ohio.ipynb
- __MACOSX/supp/D2OPE/._script
- supp/D2OPE/_Ohio_Simulator.py
- __MACOSX/supp/D2OPE/.__Ohio_Simulator.py
- supp/D2OPE/README.md
- __MACOSX/supp/D2OPE/._README.md
- supp/D2OPE/_density/
- supp/D2OPE/_density/omega_SA.py
- __MACOSX/supp/D2OPE/_density/
- __MACOSX/supp/D2OPE/_density/._omega_SA.py
- supp/D2OPE/_density/__init__.py
- __MACOSX/supp/D2OPE/_density/.___init__.py
- supp/D2OPE/_density/.ipynb_checkpoints/
- supp/D2OPE/_density/.ipynb_checkpoints/omega_SASA-checkpoint.py
- __MACOSX/supp/D2OPE/_density/.ipynb_checkpoints/
- __MACOSX/supp/D2OPE/_density/.ipynb_checkpoints/._omega_SASA-checkpoint.py
- supp/D2OPE/_density/.ipynb_checkpoints/__init__-checkpoint.py
- __MACOSX/supp/D2OPE/_density/.ipynb_checkpoints/.___init__-checkpoint.py
- supp/D2OPE/_density/.ipynb_checkpoints/omega_SA-checkpoint.py
- __MACOSX/supp/D2OPE/_density/.ipynb_checkpoints/._omega_SA-checkpoint.py
- __MACOSX/supp/D2OPE/_density/._.ipynb_checkpoints
- supp/D2OPE/_density/omega_SASA.py
- __MACOSX/supp/D2OPE/_density/._omega_SASA.py
- __MACOSX/supp/D2OPE/.__density
- supp/D2OPE/_util.py
- __MACOSX/supp/D2OPE/.__util.py
- supp/D2OPE/_cartpole.py
- __MACOSX/supp/D2OPE/.__cartpole.py
- supp/D2OPE/coinDice/
- supp/D2OPE/coinDice/env_policies.py
- __MACOSX/supp/D2OPE/coinDice/
- __MACOSX/supp/D2OPE/coinDice/._env_policies.py
- supp/D2OPE/coinDice/neural_coin_dice.py
- __MACOSX/supp/D2OPE/coinDice/._neural_coin_dice.py
- supp/D2OPE/coinDice/converter.py
- __MACOSX/supp/D2OPE/coinDice/._converter.py
- supp/D2OPE/coinDice/__init__.py
- __MACOSX/supp/D2OPE/coinDice/.___init__.py
- supp/D2OPE/coinDice/__pycache__/
- supp/D2OPE/coinDice/__pycache__/run_neural_coin_dice.cpython-36.pyc
- __MACOSX/supp/D2OPE/coinDice/__pycache__/
- __MACOSX/supp/D2OPE/coinDice/__pycache__/._run_neural_coin_dice.cpython-36.pyc
- supp/D2OPE/coinDice/__pycache__/dataset.cpython-36.pyc
- __MACOSX/supp/D2OPE/coinDice/__pycache__/._dataset.cpython-36.pyc
- supp/D2OPE/coinDice/__pycache__/env_policies.cpython-36.pyc
- __MACOSX/supp/D2OPE/coinDice/__pycache__/._env_policies.cpython-36.pyc
- supp/D2OPE/coinDice/__pycache__/value_network.cpython-36.pyc
- __MACOSX/supp/D2OPE/coinDice/__pycache__/._value_network.cpython-36.pyc
- supp/D2OPE/coinDice/__pycache__/converter.cpython-36.pyc
- __MACOSX/supp/D2OPE/coinDice/__pycache__/._converter.cpython-36.pyc
- supp/D2OPE/coinDice/__pycache__/neural_coin_dice.cpython-36.pyc
- __MACOSX/supp/D2OPE/coinDice/__pycache__/._neural_coin_dice.cpython-36.pyc
- supp/D2OPE/coinDice/__pycache__/neural_dual_dice.cpython-36.pyc
- __MACOSX/supp/D2OPE/coinDice/__pycache__/._neural_dual_dice.cpython-36.pyc
- supp/D2OPE/coinDice/__pycache__/common.cpython-36.pyc
- __MACOSX/supp/D2OPE/coinDice/__pycache__/._common.cpython-36.pyc
- supp/D2OPE/coinDice/__pycache__/estimator.cpython-36.pyc
- __MACOSX/supp/D2OPE/coinDice/__pycache__/._estimator.cpython-36.pyc
- supp/D2OPE/coinDice/__pycache__/__init__.cpython-36.pyc
- __MACOSX/supp/D2OPE/coinDice/__pycache__/.___init__.cpython-36.pyc
- __MACOSX/supp/D2OPE/coinDice/.___pycache__
- supp/D2OPE/coinDice/run_neural_coin_dice.py
- __MACOSX/supp/D2OPE/coinDice/._run_neural_coin_dice.py
- supp/D2OPE/coinDice/neural_coin_dice.py.bak
- __MACOSX/supp/D2OPE/coinDice/._neural_coin_dice.py.bak
- supp/D2OPE/coinDice/converter.py.bak
- __MACOSX/supp/D2OPE/coinDice/._converter.py.bak
- supp/D2OPE/coinDice/neural_dual_dice.py
- __MACOSX/supp/D2OPE/coinDice/._neural_dual_dice.py
- supp/D2OPE/coinDice/dataset.py
- __MACOSX/supp/D2OPE/coinDice/._dataset.py
- supp/D2OPE/coinDice/common.py
- __MACOSX/supp/D2OPE/coinDice/._common.py
- supp/D2OPE/coinDice/_util.py
- __MACOSX/supp/D2OPE/coinDice/.__util.py
- supp/D2OPE/coinDice/neural_dual_dice.py.bak
- __MACOSX/supp/D2OPE/coinDice/._neural_dual_dice.py.bak
- supp/D2OPE/coinDice/.ipynb_checkpoints/
- supp/D2OPE/coinDice/.ipynb_checkpoints/converter-checkpoint.py
- __MACOSX/supp/D2OPE/coinDice/.ipynb_checkpoints/
- __MACOSX/supp/D2OPE/coinDice/.ipynb_checkpoints/._converter-checkpoint.py
- supp/D2OPE/coinDice/.ipynb_checkpoints/value_network-checkpoint.py
- __MACOSX/supp/D2OPE/coinDice/.ipynb_checkpoints/._value_network-checkpoint.py
- supp/D2OPE/coinDice/.ipynb_checkpoints/dataset-checkpoint.py
- __MACOSX/supp/D2OPE/coinDice/.ipynb_checkpoints/._dataset-checkpoint.py
- supp/D2OPE/coinDice/.ipynb_checkpoints/env_policies-checkpoint.py
- __MACOSX/supp/D2OPE/coinDice/.ipynb_checkpoints/._env_policies-checkpoint.py
- supp/D2OPE/coinDice/.ipynb_checkpoints/neural_coin_dice-checkpoint.py
- __MACOSX/supp/D2OPE/coinDice/.ipynb_checkpoints/._neural_coin_dice-checkpoint.py
- supp/D2OPE/coinDice/.ipynb_checkpoints/neural_dual_dice-checkpoint.py
- __MACOSX/supp/D2OPE/coinDice/.ipynb_checkpoints/._neural_dual_dice-checkpoint.py
- supp/D2OPE/coinDice/.ipynb_checkpoints/_util-checkpoint.py
- __MACOSX/supp/D2OPE/coinDice/.ipynb_checkpoints/.__util-checkpoint.py
- supp/D2OPE/coinDice/.ipynb_checkpoints/estimator-checkpoint.py
- __MACOSX/supp/D2OPE/coinDice/.ipynb_checkpoints/._estimator-checkpoint.py
- supp/D2OPE/coinDice/.ipynb_checkpoints/common-checkpoint.py
- __MACOSX/supp/D2OPE/coinDice/.ipynb_checkpoints/._common-checkpoint.py
- supp/D2OPE/coinDice/.ipynb_checkpoints/run_neural_coin_dice-checkpoint.py
- __MACOSX/supp/D2OPE/coinDice/.ipynb_checkpoints/._run_neural_coin_dice-checkpoint.py
- __MACOSX/supp/D2OPE/coinDice/._.ipynb_checkpoints
- supp/D2OPE/coinDice/estimator.py
- __MACOSX/supp/D2OPE/coinDice/._estimator.py
- supp/D2OPE/coinDice/run_neural_coin_dice.py.bak
- __MACOSX/supp/D2OPE/coinDice/._run_neural_coin_dice.py.bak
- supp/D2OPE/coinDice/value_network.py
- __MACOSX/supp/D2OPE/coinDice/._value_network.py
- __MACOSX/supp/D2OPE/._coinDice
- supp/D2OPE/_analyze.py
- __MACOSX/supp/D2OPE/.__analyze.py
- __MACOSX/supp/._D2OPE
