# Supplementary material
Source: ML conference proceedings conference paper supplement (https://proceedings.mlr.press/v139/shi21d.html)
Supplement: Supplementary file 2 [file shi21d-supp.zip › supp/D2OPE/coinDice/neural_coin_dice.py]

# Copyright 2020 Google LLC.
#
# Licensed under the Apache License, Version 2.0 (the "License");
# you may not use this file except in compliance with the License.
# You may obtain a copy of the License at
#
#     http://www.apache.org/licenses/LICENSE-2.0
#
# Unless required by applicable law or agreed to in writing, software
# distributed under the License is distributed on an "AS IS" BASIS,
# WITHOUT WARRANTIES OR CONDITIONS OF ANY KIND, either express or implied.
# See the License for the specific language governing permissions and
# limitations under the License.

from __future__ import absolute_import
from __future__ import division
from __future__ import print_function

import numpy as np
import tensorflow.compat.v2 as tf
from tf_agents.specs import tensor_spec
from tf_agents.policies import tf_policy
from tf_agents.utils import common as tfagents_common
from typing import Any, Callable, Iterable, Optional, Sequence, Text, Tuple, Union

import coinDice.dataset as dataset_lib
import coinDice.common as common_lib
import coinDice.estimator as estimator_lib
from coinDice import neural_dual_dice
# !pip install tf_agents
from _util import *

reload(neural_dual_dice)


tf.keras.backend.set_floatx('float64')


class NeuralCoinDice(neural_dual_dice.NeuralDualDice):
    """Coinfidence interval policy evaluation."""

    def __init__(self,
                 dataset_spec,
                 nu_network,
                 zeta_network,
                 weight_network,
                 nu_optimizer,
                 zeta_optimizer,
                 weight_optimizer,
                 gamma: Union[float, tf.Tensor],
                 divergence_limit: Union[float, np.ndarray, tf.Tensor],
                 divergence_type: Text = 'rkl',
                 algae_alpha: Union[float, tf.Tensor] = 1.0,
                 unbias_algae_alpha: bool = False,
                 closed_form_weights: bool = True,
                 weight_by_gamma: bool = False,
                 gpu_number = 0, 
                 **kwargs):
        """Initializes the solver.

        Args:
          dataset_spec: The spec of the dataset that will be given.
          nu_network: The nu-value network.
          zeta_network: The zeta-value network.
          weight_network: The weights network.
          nu_optimizer: The optimizer to use for nu.
          zeta_optimizer: The optimizer to use for zeta.
          weight_optimizer: The optimizer to use for the weights.
          gamma: The discount factor to use.
          divergence_limit: The limit on the f-divergence between the weights and
            the empirical distribution. This should contain half as many elements as
            outputted by the nu, zeta, and weight networks.
          divergence_type: The type of f-divergence to use, e.g., 'kl'.
          algae_alpha: Regularizer coefficient on Df(dpi || dD).
          unbias_algae_alpha: Whether to learn two objectives, one with algae_alpha
            and the other with -algae_alpha, to counteract bias induced by
            algae_alpha. Defaults to False, which is more stable for optimization.
          closed_form_weights: Whether to use closed-form weights. If true,
            weight_network and weight_optimizer are ignored.
          weight_by_gamma: Weight nu and zeta losses by gamma ** step_num.
        """
        self._weight_network = weight_network
        if self._weight_network is not None:
            self._weight_network.create_variables()
        self._weight_optimizer = weight_optimizer

        self._divergence_limit = tf.convert_to_tensor(
            divergence_limit, dtype=tf.float32)
        if tf.rank(self._divergence_limit) < 1:
            self._divergence_limit = tf.expand_dims(self._divergence_limit, -1)
        self._two_sided_limit = tf.concat(
            [self._divergence_limit, self._divergence_limit], -1)
        self._num_limits = int(self._two_sided_limit.shape[0])
        self._alpha = tf.Variable(
            np.zeros(self._two_sided_limit.shape), dtype=tf.float32)

        self._divergence_type = divergence_type
        self.gpu_number = gpu_number
        self._algae_alpha = tf.convert_to_tensor(algae_alpha, dtype=tf.float32)
        if tf.rank(self._algae_alpha) < 1:
            self._algae_alpha = tf.expand_dims(self._algae_alpha, -1)
        if self._algae_alpha.shape[-1] != self._two_sided_limit.shape[-1]:
            self._algae_alpha * tf.ones_like(self._two_sided_limit)
        self._algae_alpha_sign = 2 * (
            tf.cast(self._algae_alpha >= 0, tf.float32) - 0.5)
        self._algae_alpha_sign = tf.reshape(
            tf.stack([self._algae_alpha_sign, -self._algae_alpha_sign], axis=-1),
            [2 * self._num_limits])
        self._algae_alpha_abs = tf.concat(
            2 * [tf.math.abs(self._algae_alpha)], axis=-1)
        self._unbias_algae_alpha = unbias_algae_alpha

        self._closed_form_weights = closed_form_weights
        self._weight_by_gamma = weight_by_gamma

        super(NeuralCoinDice,
              self).__init__(dataset_spec, nu_network, zeta_network, nu_optimizer,
                             zeta_optimizer, gamma, **kwargs)

    def _get_weights(self,
                     initial_env_step,
                     env_step,
                     next_env_step,
                     nu_loss,
                     alpha=None):
        if alpha is None:
            alpha = self._alpha
#         if not self._closed_form_weights:
#             network_output = self._weight_network(
#                 (initial_env_step["observation"], env_step["observation"], env_step["action"],
#                  next_env_step["observation"]))[0]
#             log_weights = network_output
#         else:
        if self._divergence_type in ['kl', 'rkl']:
            weight_loss_multiplier = self._algae_alpha_sign * tf.concat(
                2 * [tf.ones_like(self._divergence_limit)] +
                2 * [-tf.ones_like(self._divergence_limit)],
                axis=-1)
            multiplied_loss = weight_loss_multiplier * nu_loss
            combined_loss = tf.reduce_mean(
                tf.reshape(multiplied_loss, [-1, self._num_limits, 2]), axis=-1)
            log_weights = -combined_loss / tf.exp(alpha)

        batch_size = tf.cast(tf.shape(log_weights)[0], tf.float32)
        return (batch_size * tf.nn.softmax(log_weights, axis=0),
                tf.math.log(batch_size) + tf.nn.log_softmax(log_weights, 0))

    def _compute_divergence(self, weights, log_weights):
        if self._divergence_type == 'kl':
            return tf.reduce_mean(2 * weights * log_weights - 2 * weights + 2, axis=0)
        elif self._divergence_type == 'rkl':
            return tf.reduce_mean(2 * -log_weights + 2 * weights - 2, axis=0)

    def train_loss(self, initial_env_step, env_step, next_env_step, policy):
        #######  values #######
        nu_values = self._get_value(self._nu_network, env_step)
        initial_nu_values = self._get_average_value(self._nu_network,
                                                    initial_env_step, policy)
        # (2048, 4)
        next_nu_values = self._get_average_value(self._nu_network, next_env_step,
                                                 policy)
        ############################
        initial_nu_values = tf.cast(initial_nu_values, tf.float32)
        next_nu_values = tf.cast(next_nu_values, tf.float32)
        nu_values = tf.cast(nu_values, tf.float32)
        ####################################################################################################
        zeta_values = self._get_value(self._zeta_network, env_step)

        rewards = self._reward_fn(env_step)
        discounts = tf.repeat(self._gamma, len(next_env_step["observation"]))
        #discounts = self._gamma * tf.repeat(1, len(next_env_step["observation"])) #next_env_step.discount
        policy_ratio = 1.0
        bellman_residuals = (
            -nu_values + common_lib.reverse_broadcast(rewards, nu_values) +
            common_lib.reverse_broadcast(discounts * policy_ratio, nu_values) * next_nu_values)
        bellman_residuals *= self._algae_alpha_sign

        _fstar_fn = self._fstar_fn(zeta_values)
        ############################################################################################################
        bellman_residuals = tf.cast(bellman_residuals, tf.float64)
        self._algae_alpha_abs = tf.cast(self._algae_alpha_abs, tf.float64)
        _fstar_fn = tf.cast(_fstar_fn, tf.float64)
        zeta_values = tf.cast(zeta_values, tf.float64)
        ############################################################################################################
        zeta_loss = (self._algae_alpha_abs *  _fstar_fn - bellman_residuals * zeta_values)
        ############################################################################################################
        init_nu_loss = ((1 - self._gamma) * initial_nu_values *
                        self._algae_alpha_sign) # [1, -1, 1, -1]
        init_nu_loss = tf.cast(init_nu_loss, tf.float64)

        if self._primal_form:
            nu_loss = (self._algae_alpha_abs * self._f_fn(bellman_residuals / self._algae_alpha_abs) + init_nu_loss)
#         else:
#             nu_loss = -zeta_loss + init_nu_loss
        ############################################################################################################
        nu_loss = tf.cast(nu_loss, tf.float32)
        zeta_loss = tf.cast(zeta_loss, tf.float32)
        ############################################################################################################
#         if self._weight_by_gamma:
#             weights = self._gamma**tf.cast(env_step["step_num"], tf.float32)[:, None]
#             weights /= 1e-6 + tf.reduce_mean(weights)
#             nu_loss *= weights
#             zeta_loss *= weights
        # print(np.mean(nu_loss, axis = 0))
        return nu_loss, zeta_loss

    def train_step(self, initial_env_step: dataset_lib.EnvStep,
                   env_step, next_env_step,
                   #experience: dataset_lib.EnvStep,
                   target_policy: tf_policy.TFPolicy):
        """Performs a single training step based on batch.

        Args:
          initial_env_step: A batch of initial steps.
          experience: A batch of transitions. Elements must have shape [batch_size,
            2, ...].
          target_policy: The policy whose value we want to estimate.

        Returns:
          The losses and the train op.
        """
#     env_step = tf.nest.map_structure(lambda t: t[:, 0, ...], experience)
#     next_env_step = tf.nest.map_structure(lambda t: t[:, 1, ...], experience)
        with tf.device('/gpu:' + str(self.gpu_number)):
            with tf.GradientTape(
                watch_accessed_variables=False, persistent=True) as tape:
                tape.watch(self._nu_network.variables)
                tape.watch(self._zeta_network.variables)
                tape.watch(self._weight_network.variables)
                tape.watch([self._alpha])
                ############################################################################################################
                nu_loss, zeta_loss = self.train_loss(initial_env_step, env_step,
                                                     next_env_step, target_policy) # (2048, 4)
                ############################################################################################################
                if not self._unbias_algae_alpha:
                    # Zero-out components of loss made for -algae_alpha.
                    nu_loss *= tf.constant([1., 0., 1., 0.])
                    zeta_loss *= tf.constant([1., 0., 1., 0.])
                ############################################################################################################
                self._nu_regularizer = tf.cast(self._nu_regularizer, tf.float32)
                nu_reg = self._nu_regularizer * self._orthogonal_regularization(self._nu_network)
                zeta_reg = self._zeta_regularizer * self._orthogonal_regularization(self._zeta_network)
                ############################################################################################################
                # Binary search to find best alpha. Limited to just be around the
                # neighborhood of the current alpha to save on compute.
                left = self._alpha - 1 * tf.ones_like(self._two_sided_limit)
                right = self._alpha + 1 * tf.ones_like(self._two_sided_limit)
                for _ in range(4):
                    mid = 0.5 * (left + right)
                    weights, log_weights = self._get_weights(
                        initial_env_step, env_step, next_env_step, nu_loss, alpha=mid)
                    divergence = self._compute_divergence(weights, log_weights)
                    divergence_violation = divergence - self._two_sided_limit
                    left = tf.where(divergence_violation > 0., mid, left)
                    right = tf.where(divergence_violation > 0., right, mid)
                best_alpha = 0.5 * (left + right)
                self._alpha.assign(0.05 * best_alpha + 0.95 * self._alpha)
                ############################################################################################################
                weights, log_weights = self._get_weights(initial_env_step, env_step,
                                                         next_env_step, nu_loss)
                divergence = self._compute_divergence(weights, log_weights)
                divergence_violation = divergence - self._two_sided_limit
                # print(divergence, self._two_sided_limit)
                
                weighted_nu_loss = (tf.reshape(nu_loss, [-1, self._num_limits, 2]) * weights[:, :, None])
                weighted_zeta_loss = (tf.reshape(zeta_loss, [-1, self._num_limits, 2]) * weights[:, :, None])
                ############################################################################################################
                # Multiplier to make all weight optimizations minimizations.
                # Takes into account that sign of algae_alpha determines whether nu_loss
                # has switched signs (since all of nu_loss is used for minimization).
                weight_loss_multiplier = self._algae_alpha_sign * tf.concat(
                    2 * [tf.ones_like(self._divergence_limit)] +
                    2 * [-tf.ones_like(self._divergence_limit)],
                    axis=-1)
                weight_loss = tf.reduce_mean(tf.reshape(weight_loss_multiplier * nu_loss, [-1, self._num_limits, 2]), 1)
                weight_loss += tf.exp(self._alpha) * divergence_violation

                reg_weighted_nu_loss = weighted_nu_loss + nu_reg
                reg_weighted_zeta_loss = weighted_zeta_loss + nu_reg
                ############################################################################################################
            nu_grads = tape.gradient(reg_weighted_nu_loss, self._nu_network.variables)
            nu_grad_op = self._nu_optimizer.apply_gradients(
                zip(nu_grads, self._nu_network.variables))

            zeta_grads = tape.gradient(reg_weighted_zeta_loss,
                                       self._zeta_network.variables)
            zeta_grad_op = self._zeta_optimizer.apply_gradients(
                zip(zeta_grads, self._zeta_network.variables))

#             if not self._closed_form_weights:
#                 weight_grads = tape.gradient(weight_loss, self._weight_network.variables)
#                 weight_grad_op = self._weight_optimizer.apply_gradients(
#                     zip(weight_grads, self._weight_network.variables))
#             else:
            weight_grad_op = tf.group()
            ############################################################################################################
            for idx in range(self._num_limits):
                tf.summary.scalar('divergence%d' % idx, divergence[idx])
                tf.summary.scalar('nu_loss%d' % idx, tf.reduce_mean(nu_loss, 0)[idx])
                tf.summary.scalar('zeta_loss%d' % idx, tf.reduce_mean(zeta_loss, 0)[idx])
                tf.summary.scalar('exp_alpha%d' % idx, tf.exp(self._alpha[idx]))
                tf.summary.histogram('weights%d' % idx, weights[:, idx])
            ############################################################################################################
            estimate = tf.reduce_mean(
                weighted_nu_loss * tf.reshape(self._algae_alpha_sign, [self._num_limits, 2]), axis=[0, -1])
            if not self._unbias_algae_alpha:
                estimate = 2 * estimate  # Counteract reduce_mean above.
            ############################################################################################################
            return ((estimate
                     , tf.reshape(tf.reduce_mean(weighted_nu_loss, [0]), [-1])
                     , tf.reshape(tf.reduce_mean(weighted_zeta_loss, [0]),[-1])
                     , tf.reduce_mean(weight_loss, 0)
                     , divergence),
                    tf.group(nu_grad_op, zeta_grad_op, weight_grad_op)
                   )
