# Supplementary material
Source: ML conference proceedings conference paper supplement (https://proceedings.mlr.press/v139/shi21d.html)
Supplement: Supplementary file 2 [file shi21d-supp.zip › supp/D2OPE/coinDice/neural_dual_dice.py]

# Copyright 2020 Google LLC.
#
# Licensed under the Apache License, Version 2.0 (the "License");
# you may not use this file except in compliance with the License.
# You may obtain a copy of the License at
#
#     http://www.apache.org/licenses/LICENSE-2.0
#
# Unless required by applicable law or agreed to in writing, software
# distributed under the License is distributed on an "AS IS" BASIS,
# WITHOUT WARRANTIES OR CONDITIONS OF ANY KIND, either express or implied.
# See the License for the specific language governing permissions and
# limitations under the License.

from __future__ import absolute_import
from __future__ import division
from __future__ import print_function

import numpy as np
import tensorflow.compat.v2 as tf
from tf_agents.specs import tensor_spec
from tf_agents.policies import tf_policy
from tf_agents.utils import common as tfagents_common
from typing import Any, Callable, Iterable, Optional, Sequence, Tuple, Union

from . import dataset as dataset_lib
from . import common as common_lib
from . import estimator as estimator_lib


class NeuralDualDice(object):
    """Policy evaluation with DualDICE."""

    def __init__(self, dataset_spec,
                 nu_network,
                 zeta_network,
                 nu_optimizer,
                 zeta_optimizer,
                 gamma: Union[float, tf.Tensor],
                 reward_fn: Callable = None,
                 solve_for_state_action_ratio: bool = True,
                 f_exponent: float = 1.5,
                 primal_form: bool = False,
                 num_samples: Optional[int] = None,
                 nu_regularizer: float = 0.,
                 zeta_regularizer: float = 0.):
        """Initializes the solver.

        Args:
          dataset_spec: The spec of the dataset that will be given.
          nu_network: The nu-value network.
          zeta_network: The zeta-value network.
          nu_optimizer: The optimizer to use for nu.
          zeta_optimizer: The optimizer to use for zeta.
          gamma: The discount factor to use.
          reward_fn: A function that takes in an EnvStep and returns the reward
            for that step. If not specified, defaults to just EnvStep.reward.
          solve_for_state_action_ratio: Whether to solve for state-action density
            ratio. Defaults to True.
          f_exponent: Exponent p to use for f(x) = |x|^p / p.
          primal_form: Whether to use primal form of DualDICE, which optimizes for
            nu independent of zeta. This form is biased in stochastic environments.
            Defaults to False, which uses the saddle-point formulation of DualDICE.
          num_samples: Number of samples to take from policy to estimate average
            next nu value. If actions are discrete, this defaults to computing
            average explicitly. If actions are not discrete, this defaults to using
            a single sample.
          nu_regularizer: Regularization coefficient on nu network.
          zeta_regularizer: Regularization coefficient on zeta network.
        """

        self._nu_network = nu_network
        self._nu_network.create_variables()
        self._zeta_network = zeta_network
        self._zeta_network.create_variables()

        self._nu_optimizer = nu_optimizer
        self._zeta_optimizer = zeta_optimizer
        self._nu_regularizer = nu_regularizer
        self._zeta_regularizer = zeta_regularizer

        self._gamma = gamma
        if reward_fn is None:
            reward_fn = lambda env_step: env_step["reward"]
        self._reward_fn = reward_fn
        self._num_samples = num_samples

        self._solve_for_state_action_ratio = solve_for_state_action_ratio
#     if (not self._solve_for_state_action_ratio and
#         not self._dataset_spec.has_log_probability()):
#       raise ValueError('Dataset must contain log-probability when '
#                        'solve_for_state_action_ratio is False.')

#         if f_exponent <= 1:
#             raise ValueError('Exponent for f must be greater than 1.')
        fstar_exponent = f_exponent / (f_exponent - 1)
        self._f_fn = lambda x: tf.abs(x) ** f_exponent / f_exponent
        self._fstar_fn = lambda x: tf.abs(x) ** fstar_exponent / fstar_exponent

        self._categorical_action = True

        self._primal_form = primal_form
        self._initialize()

    def _initialize(self):
        pass

    def _get_value(self, network, env_step):
        if self._solve_for_state_action_ratio:
            return network((env_step["observation"], env_step["action"]))[0]
        else:
            return network(env_step["observation"])[0]

    def _get_average_value(self, network, env_step, policy):
        if self._solve_for_state_action_ratio:
            #tfagents_step = dataset_lib.convert_to_tfagents_timestep(env_step)
            if self._categorical_action and self._num_samples is None:
                action_weights = policy.get_A_prob(env_step["observation"])
#         action_weights = policy.distribution(
#             tfagents_step).action.probs_parameter()
                action_dtype = tf.int64
                batch_size = tf.shape(action_weights)[0]
                num_actions = tf.shape(action_weights)[-1]
                actions = (  # Broadcast actions
                    tf.ones([batch_size, 1], dtype=action_dtype) *
                    tf.range(num_actions, dtype=action_dtype)[None, :])
#             else:
#                 batch_size = tf.shape(env_step["observation"])[0]
#                 num_actions = self._num_samples
#                 action_weights = tf.ones([batch_size, num_actions]) / num_actions
#                 actions = tf.stack(
#                     [policy.get_A(env_step["observation"])
#                      for _ in range(num_actions)],
#                     axis=1)
#             actions = tf.stack(
#                 [policy.action(tfagents_step).action
#                  for _ in range(num_actions)],
#                 axis=1)

            ###### Q netowkr and inputs ######
            flat_actions = tf.reshape(actions, [batch_size * num_actions] +
                                      actions.shape[2:].as_list())
            flat_observations = tf.reshape(
                tf.tile(env_step["observation"][:, None, ...],
                        [1, num_actions] + [1] * len(env_step["observation"].shape[1:])),
                [batch_size * num_actions] + env_step["observation"].shape[1:].as_list())
            flat_values, _ = network((flat_observations, flat_actions))
            values = tf.reshape(flat_values, [batch_size, num_actions] +
                                flat_values.shape[1:].as_list())
            values = tf.cast(values, tf.float64)
            
            ###### Weighted to get V ######
            v = tf.reduce_sum(
                values * common_lib.reverse_broadcast(action_weights, values),
                axis=1) # (bs, 5, 4) -> (bs, 4)
            return v
#         else:
#             return network(env_step["observation"])[0]

    def _orthogonal_regularization(self, network):
        reg = 0
        for layer in network.layers:
            if isinstance(layer, tf.keras.layers.Dense):
                prod = tf.matmul(tf.transpose(layer.kernel), layer.kernel)
                prod = tf.cast(prod, tf.float32)
                reg += tf.reduce_sum(
                    tf.math.square(prod * (1 - tf.eye(prod.shape[0]))))
        return reg

    def train_loss(self, initial_env_step, env_step, next_env_step, policy):
        nu_values = self._get_value(self._nu_network, env_step)
        initial_nu_values = self._get_average_value(
            self._nu_network, initial_env_step, policy)
        next_nu_values = self._get_average_value(
            self._nu_network, next_env_step, policy)
        zeta_values = self._get_value(self._zeta_network, env_step)
        
        discounts = tf.repeat(self._gamma, len(next_env_step["observation"]))
        # discounts = self._gamma * tf.repeat(1, len(next_env_step["observation"])) #next_env_step.discount
        policy_ratio = 1.0
#     if not self._solve_for_state_action_ratio:
#       tfagents_step = dataset_lib.convert_to_tfagents_timestep(env_step)
#       policy_log_probabilities = policy.distribution(
#           tfagents_step).action.log_prob(env_step.action)
#       policy_ratio = tf.exp(
#           policy_log_probabilities - env_step.get_log_probability())

        bellman_residuals = (
            nu_values - common_lib.reverse_broadcast(
                discounts * policy_ratio, nu_values) * next_nu_values)

        zeta_loss = self._fstar_fn(zeta_values) - bellman_residuals * zeta_values
        if self._primal_form:
            nu_loss = (self._f_fn(bellman_residuals)
                       - (1 - self._gamma) * initial_nu_values)
#         else:
#         nu_loss = -zeta_loss - (1 - self._gamma) * initial_nu_values

        return nu_loss, zeta_loss

    @tf.function
    def train_step(self,
                   initial_env_step: dataset_lib.EnvStep,
                   experience: dataset_lib.EnvStep,
                   target_policy: tf_policy.TFPolicy):
        """Performs a single training step based on batch.

        Args:
          initial_env_step: A batch of initial steps.
          experience: A batch of transitions. Elements must have shape
            [batch_size, 2, ...].
          target_policy: The policy whose value we want to estimate.

        Returns:
          The losses and the train op.
        """
        env_step = tf.nest.map_structure(lambda t: t[:, 0, ...], experience)
        next_env_step = tf.nest.map_structure(lambda t: t[:, 1, ...], experience)

        with tf.GradientTape(watch_accessed_variables=False,
                             persistent=True) as tape:
            tape.watch(self._nu_network.variables)
            tape.watch(self._zeta_network.variables)
            nu_loss, zeta_loss = self.train_loss(
                initial_env_step, env_step, next_env_step, target_policy)
            nu_loss += self._nu_regularizer * self._orthogonal_regularization(
                self._nu_network)
            zeta_loss += self._zeta_regularizer * self._orthogonal_regularization(
                self._zeta_network)

        nu_grads = tape.gradient(nu_loss, self._nu_network.variables)
        nu_grad_op = self._nu_optimizer.apply_gradients(
            zip(nu_grads, self._nu_network.variables))

        zeta_grads = tape.gradient(zeta_loss, self._zeta_network.variables)
        zeta_grad_op = self._zeta_optimizer.apply_gradients(
            zip(zeta_grads, self._zeta_network.variables))

        return (tf.reduce_mean(nu_loss), tf.reduce_mean(zeta_loss))

    def estimate_average_reward(self,
                                dataset: dataset_lib.OffpolicyDataset,
                                target_policy: tf_policy.TFPolicy):
        """Estimates value (average per-step reward) of policy.

        Args:
          dataset: The dataset to sample experience from.
          target_policy: The policy whose value we want to estimate.

        Returns:
          Estimated average per-step reward of the target policy.
        """
        def weight_fn(env_step):
            zeta = self._get_value(self._zeta_network, env_step)

            policy_ratio = 1.0
#       if not self._solve_for_state_action_ratio:
#         tfagents_timestep = dataset_lib.convert_to_tfagents_timestep(env_step)
#         target_log_probabilities = target_policy.distribution(
#             tfagents_timestep).action.log_prob(env_step.action)
#         policy_ratio = tf.exp(
#             target_log_probabilities -
#             env_step.get_log_probability())

            return zeta * common_lib.reverse_broadcast(policy_ratio, zeta)
        v = estimator_lib.get_fullbatch_average(
            dataset, limit=None, by_steps=True,
            reward_fn=self._reward_fn, weight_fn=weight_fn)
        return v
