# Supplementary material
Source: ML conference proceedings conference paper supplement (https://proceedings.mlr.press/v139/shi21d.html)
Supplement: Supplementary file 2 [file shi21d-supp.zip › supp/D2OPE/TOY/TOY_coverage.ipynb]

# %% [code]
from _util import *
import _discrete as discrete
import _analyze as analyze
reload(discrete)

os.environ["OMP_NUM_THREADS"] = "1"
os.environ["MKL_NUM_THREADS"] = "1"
os.environ["OPENBLAS_NUM_THREADS"] = "1"
os.environ["VECLIB_MAXIMUM_THREADS"] = "1"
os.environ["NUMEXPR_NUM_THREADS"] = "1"

################################################
data_existed = 1
gamma = 0.95 # 0.99
pi1 = pi = discrete.toy_pi()
################################################
if not data_existed:
    N = 10000
    T = 200 #1000
    
    simu_circle = discrete.simuCricle(gamma = gamma, pi = pi) 
    trajs_behav, details_behav = simu_circle.simu_trajs(N, T, policy = "behav")
    trajs_tp, details_tp = simu_circle.simu_trajs(N, T, policy = "tp")

    ################################################
    omega = simu_circle.get_omega(details_behav, details_tp)
    V_true, V_true_std = simu_circle.get_V(details_tp[2])

    printR("true_V = {:.3f} with std = {:.3f}".format(V_true, V_true_std))
    ################################################
    omega_star = []
    Q = np.zeros((3, 2))

    for S in [0, 1, 2]:
        omega_star_fixed_S = []
        for A in [-1, 1]:
            init_SA = [S, A]
            a = now()
            trajs_tp, details_tp = simu_circle.simu_trajs(N, T, policy = "tp", init_SA = init_SA)
            omega = simu_circle.get_omega(details_behav, details_tp)
            omega_star_fixed_S.append(omega)
            Q[S, (A + 1) // 2], std_Q = simu_circle.get_V(details_tp[2])
            print(S, A, "DONE! with mean = {:.3f} and std = {:.3f}".format(Q[S, (A + 1) // 2], std_Q))
        omega_star.append(omega_star_fixed_S)
    omega_star = np.array(omega_star)
    toy_data = {"V_true" : V_true
               , "Q" : Q
               , "omega" : omega
               , "omega_star" : omega_star}
    # dump(toy_data, "toy_data")
else:
    toy_data = load("res/toy_data_095")
#     toy_data = load("res/toy_data")
    V_true = toy_data["V_true"]
    Q = toy_data["Q"]
    omega = toy_data["omega"]
    omega_star = toy_data["omega_star"]


# %% [code]
reload(discrete)
incomplete_ratio = None

rep = 200

################################################
T = 50
Q_ratio =  5
omega_ratio = 25 #25
omega_star_ratio = 25
init_size = 2000
################################################     
res_all = []


seed = 0
np.random.seed(seed)
printR("<<<<<<<<<< T = {}, Q_ratio = {}, omega_ratio = {}, init_S = {}>>>>>>>>>>>".format(T
                                                                                          , Q_ratio, omega_ratio, init_size))
res_diff_rate = []
for rate in [-1/2, -1/4, -1/6]:
    printG("rate = {}".format(rate))
    N_range = np.arange(50, 500, 50)
    res_this = []
    for N in N_range:
        if N <= 200:
            n_gpu = 100
        elif N <= 400:
            n_gpu = 50
        else:
            n_gpu = 20
        printR("\n N = {}".format(N))
        ray.shutdown()
        simu_circle = discrete.simuCricle(gamma = gamma, pi = pi) 

        a = now()
        rec = analyze.recorder()

        for i in range(rep // n_gpu):
            @ray.remote # num_cpus=1 # ()
            def one_seed1(seed):
                reload(discrete)
                os.environ["OMP_NUM_THREADS"] = "1"
                os.environ["MKL_NUM_THREADS"] = "1"
                os.environ["OPENBLAS_NUM_THREADS"] = "1"
                os.environ["VECLIB_MAXIMUM_THREADS"] = "1"
                os.environ["NUMEXPR_NUM_THREADS"] = "1"

                np.random.seed(seed)
                ###############################################
                Q_error = Q + randn(3, 2) / Q_ratio * (N ** (rate))

                omega_error = omega + randn(3, 2) / omega_ratio * (N ** (rate))
                omega_error /= np.mean(omega_error)
                omega_star_error = omega_star.copy()
                for s in range(3):
                    for a in range(2):
                        omega_star_error[s][a] = omega_star[s][a] + randn(3, 2) / omega_star_ratio * (N ** (rate))
                        omega_star_error[s][a] /= np.mean(omega_star_error[s][a])

                Q_used = Q_error.copy()
                omega_used = omega_error.copy()
                omega_star_used = omega_star_error.copy()
                ############################
                true_Q = discrete.TrueQ(Q_used)
                true_omega = discrete.TrueOmega(omega_used)
                true_omega_star = discrete.TrueOmega_star(omega_star_used)
                ####################################################################################


                trajs_train, _ = simu_circle.simu_trajs(N, T, policy = "behav", seed = seed)
                gpu_idx = 0
                # ############################ TRIPLE to estimate values ############################
                are = discrete.ARE_discrete(trajs_train, pi = pi1, gamma = gamma, gpu_number = gpu_idx, incomplete_ratio = incomplete_ratio, L = 2
                                , sepe_A = True)
                init_S = np.random.choice(a = 3, size = init_size, p = [1 / 3, 1 / 3, 1 / 3])
                are.init_S = init_S 
                are.load_true(true_Q, true_omega, true_omega_star)
                are.est_double_robust()
                are.est_triply_robust()  
                are.est_quad_robust()
                #######
                return [are.raw_Qs, are.DR_V, are.TR_V, are.QR_V]
            ray.init()
            ###########
            futures = [one_seed1.remote(j) for j in range(n_gpu * i, n_gpu * (i + 1))]
            res = ray.get(futures)
            for j in range(n_gpu):
                rec.update(V_true, are_details = res[j])
    #         rec.analyze()
            ray.shutdown()
        rec.analyze()
        res_this.append(rec)
    res_diff_rate.append(res_this)
res_all.append(res_diff_rate)
res_all3 = res_all

# %% [code]
final_res = arr([[[mean(a.DR['freq']['10'])
, mean(a.TR['freq']['10'])
, mean(a.QR['freq']['10'])] for a in b] for b in res_all3[0]])

# %% [code]
import _plot as plot
from matplotlib.transforms import BlendedGenericTransform

marker = "o"
xlabel = "n"
############################################
X_range = np.arange(50, 500, 50)
labels = ['DRL', 'TR(2nd order)', 'TR(3rd order)']

fig, axs = plt.subplots(1, 3,figsize=(15,3))
plt.subplots_adjust(wspace = .12)

rates = [r"$(nT)^{-1/2}$", r"$(nT)^{-1/4}$", r"$(nT)^{-1/6}$"]
y_lab = [None, None, None] # "frequency"
for i in range(3):
    ax09, legends09 = plot.plot_curves(final_res[i].T, horizontal = 0.9, x_axis = X_range, title = rates[i]
              , labels = labels, legend_title = "Method"
              , y_high = 1.05, y_low = 0, marker = marker
              , title_size = 30, x_label_size = 30, y_label_size = 26
              , xlabel = xlabel, y_lab = y_lab[i], path = None
             , ax = axs[i], is_sub_plot = True, print_legend = False)


leg = fig.legend(
          legends09 + [ax09.get_legend_handles_labels()[0][-1]]    # The line objects
      , labels= labels   # The labels for each line
        , bbox_to_anchor = [0.85, -0.25] # location
    , ncol=3, numpoints=1
    , fontsize = 24
        , bbox_transform = BlendedGenericTransform(fig.transFigure, ax09.transAxes)
)


fig.show()

fig.savefig("final_plot/plot/" + "toy_CI_new.png"
           ,  bbox_extra_artists=(leg,), bbox_inches='tight')


# %% [code]
