# Supplementary material
Source: ML conference proceedings conference paper supplement (https://proceedings.mlr.press/v139/shi21d.html)

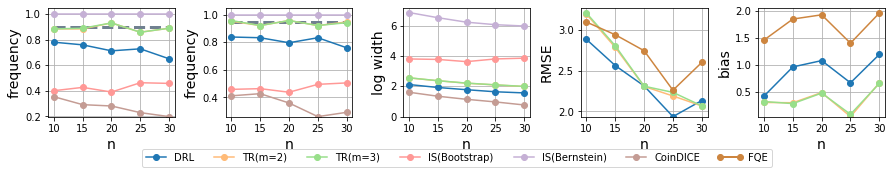

Supplement: Supplementary file 2 [file shi21d-supp.zip › supp/D2OPE/ohio_n.png]

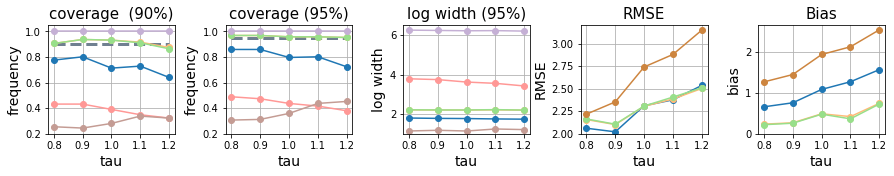

Supplement: Supplementary file 2 [file shi21d-supp.zip › supp/D2OPE/ohio_tau.png]
